# Supplementary material
Source: Springer Nature journal article supplement (https://www.springermedizin.de/resource/supplementary/12913_2012_2360_MOESM1_ESM.pdf/9530416)
Supplement: MOESM1 [file 9530416]

## Innovations in Healthcare

This survey is designed to explore the factors that influence the uptake of innovations into practice as part of a National Institute for Health Research funded programme. The survey is made up of four short sections. In the first we are interested in the way in which your practice works. The second aims to understand the channels of communication across the PCT, and the third is interested in clinical practice in your field. The final set of demographic questions helps us understand the results of our analysis. Please be assured that they will not be used to identify you at any stage, instead they will be analysed at a group level. There are no 'wrong' answers so please be as honest as possible.

**Please be assured that your data will be treated with the strictest of confidence. Although section two asks you to identify individuals by name, this information will be used only during analysis and will not be revealed when results are reported.**

The survey has been designed to be completed in the order in which the sections are presented and should take around 20-30 minutes to complete. In recognition of this, on completion of the survey we would like to offer you the chance to be entered into our prize draw for £100 worth of Amazon.co.uk vouchers.

PLEASE READ THE ACCOMPANYING INFORMATION SHEET BEFORE COMPLETING THE SURVEY

Having read the information sheet, if you would like to help us by completing this survey, please tick the box below to indicate that you have read and understood the information sheet and that you consent to your data being used for research purposes.

I have read and understood the information sheet

## Section One

## Where You Work

There are a number of ways in which the team in which we work can influence how we ourselves work. In the first section of the survey we are interested in your perceptions of the culture, or '*the way things are done around here*', of your practice.

For each question please circle the response that best reflects your personal opinion.

### 1 How frequently do you interact with other members of your practice?

Daily      A few times a week      A few times a month      Around once a month      Less frequently than once a month

Thinking about what your practice's day-to-day objectives are, please circle the appropriate response to the following questions.

### 2 How far are you in agreement with your practice's objectives?

Not at all      To a small extent      Neither to a small nor large extent      To a large extent      Completely

### 3 To what extent do you think your practice's objectives are clearly understood by other members of the practice?

Not at all      To a small extent      Neither to a small nor large extent      To a large extent      Completely

### 4 To what extent do you think your practice's objectives can actually be achieved?

Not at all      To a small extent      Neither to a small nor large extent      To a large extent      Completely

### 5 How worthwhile do you think these objectives are to the organisation?

Not at all      To a small extent      Neither to a small nor large extent      To a large extent      Completely

Thinking of the way that your practice works, please respond to the following statements.

**6 We have a 'we are in it together attitude'**

Strongly disagree

Disagree

Neither agree nor disagree

Agree

Strongly agree

**7 People keep each other informed about work related issues in the practice**

Strongly disagree

Disagree

Neither agree nor disagree

Agree

Strongly agree

**8 People feel understood and accepted by each other**

Strongly disagree

Disagree

Neither agree nor disagree

Agree

Strongly agree

**9 There are real attempts to share information throughout the practice**

Strongly disagree

Disagree

Neither agree nor disagree

Agree

Strongly agree

**10 Are practice members prepared to question the basis of what the practice is doing?**

To a very small extent

To a small extent

Neither to a small nor large extent

To a large extent

To a very large extent

**11 Does the practice critically appraise potential weaknesses in what it is doing in order to achieve the best possible outcome?**

To a very small extent

To a small extent

Neither to a small nor large extent

To a large extent

To a very large extent

**12 Do members of the practice build on each other's ideas in order to achieve the best possible outcome?**

To a very small extent

To a small extent

Neither to a small nor large extent

To a large extent

To a very large extent

**13 People in this practice are always searching for fresh, new ways of looking at problems**

Strongly disagree

Disagree

Neither agree nor disagree

Agree

Strongly agree

**14 In this practice we take the time needed to develop new ideas**

Strongly disagree

Disagree

Neither agree nor disagree

Agree

Strongly agree

**15 People in the practice cooperate in order to help develop and apply new ideas**

Strongly disagree

Disagree

Neither agree nor disagree

Agree

Strongly agree

**16** To what extent do you feel that you *identify* with your practice?

Not at all

To a small  
extent

Neither to a  
small nor large  
extent

To a large  
extent

Completely

**Please turn over to complete the next section**

## Section Two

## COMMUNICATION NETWORKS

In this section of the survey we are interested in the people you have had contact with over the past 12 months about your day to day practice in the treatment of depression, specifically, women with depression. We ask this information because sharing information with colleagues is seen as a way of spreading good practice and diffusing new ideas. In the following table please list the names of people with whom you have discussed your day to day practice in the treatment of women with depression. These may be people from whom you have sought guidance or information, people who have sought guidance or information from you, or simply people with whom you have generally discussed practice in this area. We have provided room for six people's names, however, do not feel that you have to fill all of the boxes.

In the table please write the full name of the people with whom you discuss your practice in the treatment of women with depression. For each of the people you have named, please indicate

- **Who** typically provides advice (you do, the other person does, it is equally likely to be either of you)
- **How often** you are in contact about this topic (whether you feel it is regular versus occasional)
- How do you **typically contact** each other (face to face, in a meeting or training forum, on the phone, by email, other)
- Their **job role** or title
- Whether the contact is (part of your immediate team, part of your extended team, works within the PCT but not in your team, is someone who works outside the PCT)

|                 | Full name | During the contact with this person are you                                                      | Frequency of contact             | Predominant mode of contact                                                                                        | Their relationship to you?                                                                                                    | Job role                                                                                                                                                                                                                                                                                                                                        |
|-----------------|-----------|--------------------------------------------------------------------------------------------------|----------------------------------|--------------------------------------------------------------------------------------------------------------------|-------------------------------------------------------------------------------------------------------------------------------|-------------------------------------------------------------------------------------------------------------------------------------------------------------------------------------------------------------------------------------------------------------------------------------------------------------------------------------------------|
| <b>Person 1</b> |           | <p>Usually giving them advice</p> <p>Usually receiving their advice</p> <p>It goes both ways</p> | <p>Regular</p> <p>Occasional</p> | <p>Casual/Face2face</p> <p>Telephone</p> <p>Email</p> <p>Training event</p> <p>Formal group event</p> <p>Other</p> | <p>Part of your immediate team</p> <p>Extended team</p> <p>Within the PCT but not within your team</p> <p>Outside the PCT</p> | <p>GP</p> <p>Practice nurse</p> <p>Midwife</p> <p>Practice Manager</p> <p>Nurse Practitioner</p> <p>Commissioner</p> <p>Health visitor</p> <p>Support worker</p> <p>Healthcare assistant</p> <p>Psychologist</p> <p>Community Psychiatric Nurse</p> <p>Psychological therapist (covering CBT, counselling)</p> <p>Psychiatrist</p> <p>Other</p> |
| <b>Person 2</b> |           | <p>Usually giving them advice</p> <p>Usually receiving their advice</p> <p>It goes both ways</p> | <p>Regular</p> <p>Occasional</p> | <p>Casual/Face2face</p> <p>Telephone</p> <p>Email</p> <p>Training event</p> <p>Formal group event</p> <p>Other</p> | <p>Part of your immediate team</p> <p>Extended team</p> <p>Within the PCT but not within your team</p> <p>Outside the PCT</p> | <p>GP</p> <p>Practice nurse</p> <p>Midwife</p> <p>Practice Manager</p> <p>Nurse Practitioner</p> <p>Commissioner</p> <p>Health visitor</p> <p>Support worker</p> <p>Healthcare assistant</p> <p>Psychologist</p> <p>Community Psychiatric Nurse</p> <p>Psychological therapist (covering CBT, counselling)</p> <p>Psychiatrist</p> <p>Other</p> |

|                 | Full name | During the contact with this person are you                                                      | Frequency of contact             | Predominant mode of contact                                                                                        | Their relationship to you?                                                                                                    | Job role                                                                                                                                                                                                                                                                                                                                        |
|-----------------|-----------|--------------------------------------------------------------------------------------------------|----------------------------------|--------------------------------------------------------------------------------------------------------------------|-------------------------------------------------------------------------------------------------------------------------------|-------------------------------------------------------------------------------------------------------------------------------------------------------------------------------------------------------------------------------------------------------------------------------------------------------------------------------------------------|
| <b>Person 3</b> |           | <p>Usually giving them advice</p> <p>Usually receiving their advice</p> <p>It goes both ways</p> | <p>Regular</p> <p>Occasional</p> | <p>Casual/Face2face</p> <p>Telephone</p> <p>Email</p> <p>Training event</p> <p>Formal group event</p> <p>Other</p> | <p>Part of your immediate team</p> <p>Extended team</p> <p>Within the PCT but not within your team</p> <p>Outside the PCT</p> | <p>GP</p> <p>Practice nurse</p> <p>Midwife</p> <p>Practice Manager</p> <p>Nurse Practitioner</p> <p>Commissioner</p> <p>Health visitor</p> <p>Support worker</p> <p>Healthcare assistant</p> <p>Psychologist</p> <p>Community Psychiatric Nurse</p> <p>Psychological therapist (covering CBT, counselling)</p> <p>Psychiatrist</p> <p>Other</p> |
| <b>Person 4</b> |           | <p>Usually giving them advice</p> <p>Usually receiving their advice</p> <p>It goes both ways</p> | <p>Regular</p> <p>Occasional</p> | <p>Casual/Face2face</p> <p>Telephone</p> <p>Email</p> <p>Training event</p> <p>Formal group event</p> <p>Other</p> | <p>Part of your immediate team</p> <p>Extended team</p> <p>Within the PCT but not within your team</p> <p>Outside the PCT</p> | <p>GP</p> <p>Practice nurse</p> <p>Midwife</p> <p>Practice Manager</p> <p>Nurse Practitioner</p> <p>Commissioner</p> <p>Health visitor</p> <p>Support worker</p> <p>Healthcare assistant</p> <p>Psychologist</p> <p>Community Psychiatric Nurse</p> <p>Psychological therapist (covering CBT, counselling)</p> <p>Psychiatrist</p> <p>Other</p> |



|                 | Full name | During the contact with this person are you                                                      | Frequency of contact             | Predominant mode of contact                                                                                        | Their relationship to you?                                                                                                    | Job role                                                                                                                                                                                                                                                                                                                                        |
|-----------------|-----------|--------------------------------------------------------------------------------------------------|----------------------------------|--------------------------------------------------------------------------------------------------------------------|-------------------------------------------------------------------------------------------------------------------------------|-------------------------------------------------------------------------------------------------------------------------------------------------------------------------------------------------------------------------------------------------------------------------------------------------------------------------------------------------|
| <b>Person 5</b> |           | <p>Usually giving them advice</p> <p>Usually receiving their advice</p> <p>It goes both ways</p> | <p>Regular</p> <p>Occasional</p> | <p>Casual/Face2face</p> <p>Telephone</p> <p>Email</p> <p>Training event</p> <p>Formal group event</p> <p>Other</p> | <p>Part of your immediate team</p> <p>Extended team</p> <p>Within the PCT but not within your team</p> <p>Outside the PCT</p> | <p>GP</p> <p>Practice nurse</p> <p>Midwife</p> <p>Practice Manager</p> <p>Nurse Practitioner</p> <p>Commissioner</p> <p>Health visitor</p> <p>Support worker</p> <p>Healthcare assistant</p> <p>Psychologist</p> <p>Community Psychiatric Nurse</p> <p>Psychological therapist (covering CBT, counselling)</p> <p>Psychiatrist</p> <p>Other</p> |
| <b>Person 6</b> |           | <p>Usually giving them advice</p> <p>Usually receiving their advice</p> <p>It goes both ways</p> | <p>Regular</p> <p>Occasional</p> | <p>Casual/Face2face</p> <p>Telephone</p> <p>Email</p> <p>Training event</p> <p>Formal group event</p> <p>Other</p> | <p>Part of your immediate team</p> <p>Extended team</p> <p>Within the PCT but not within your team</p> <p>Outside the PCT</p> | <p>GP</p> <p>Practice nurse</p> <p>Midwife</p> <p>Practice Manager</p> <p>Nurse Practitioner</p> <p>Commissioner</p> <p>Health visitor</p> <p>Support worker</p> <p>Healthcare assistant</p> <p>Psychologist</p> <p>Community Psychiatric Nurse</p> <p>Psychological therapist (covering CBT, counselling)</p> <p>Psychiatrist</p> <p>Other</p> |

### Section Three Management of Women with Postnatal Depression

In the previous section of the survey you were asked about who you contact, or who contacts you for guidance and information relating to the treatment of women with depression. In this section of the survey we are interested in your views on referrals for psychological treatments as a first stage intervention specifically for mild to moderate postnatal depression (covering any depression diagnosed within 12 months following birth).

When we refer to 'psychological treatments' we mean *any* non-pharmaceutical treatment for postnatal depression: Cognitive Behavioural Therapy (CBT), Computerised CBT, other guided self help, exercise, Interpersonal Psychotherapy, non-directive counselling delivered at home (Listening visits), and referral to a counsellor, psychologist or other mental health practitioner.

**23 Are you aware of the NICE guidance on the use of psychological treatments for mild to moderate postnatal depression?**

Yes

No

**24 If 'yes', how familiar would you say you are with the guidance?**

I am aware of it but have not read it

I have read it

I have read and used it in clinical practice

**25 Thinking of women who might present with mild to moderate postnatal depression over the next six months, how likely is it that you would refer them for psychological treatment as a first stage intervention?**

Very unlikely

Unlikely

Neither unlikely nor likely

Likely

Very likely

Thinking of referrals for psychological treatments as a first stage intervention for mild to moderate postnatal depression, for each of the questions below, please circle the response that best reflects your personal opinion:

**26 In your opinion, would you rate the impact on patient care and clinical outcomes of such referrals as being of**

Limited  
improvement

Modest  
improvement

Significant  
improvement

**27 In your opinion, would you rate the costs associated with such referrals as being**

Small

Medium

Large

**28 In your opinion, do you feel that there is local expertise in the field relating to such referrals?**

Yes

No

**29 In your opinion, do you feel that current services are meeting minimum standards in terms of such referrals?**

Yes

No

**30 In your opinion, the strength of the supporting evidence for such referrals is**

Weak

Medium

Strong

**31 In your opinion, do you consider such referrals to be a**

National priority

Local priority

Both national and  
local priority

**32 In your opinion, would you rate the prevalence of postnatal depression in the local population as being**

low prevalence of  
condition/disease

high prevalence of  
condition/disease

**33 Thinking back over the past six months, how many women have you seen with mild to moderate postnatal depression? (covering any depression diagnosed within 12 months following birth)**

**34 Thinking back over the past six months, of the women that you have seen with mild to moderate postnatal depression how many have you referred for psychological treatment as a first stage intervention?**

**35 If there have been situations where you have prescribed anti-depressants first, what contributed to your decision to do so?**

**36 Thinking specifically about referring women with mild to moderate postnatal depression for psychological treatments, are there any factors, not covered by the survey so far, that you feel make it more or less easy for you to refer in your day to day practice?**

A large, empty, rounded rectangular box with a thin black border, intended for the respondent to write their answer to the question above. The box is white and occupies the central portion of the page.

**Section Four**

**About You**

**Please tick the appropriate box for each question**

**37** Your job role is (Please tick all that apply)

GP: Partner

GP: Salaried

GP: Locum

GP: Retainer

GP with Specialist Interest

GP: PCT Clinical Lead

Nurse Practitioner

**37a** If you indicated that you are a GP with Special Interest or PCT Clinical Lead, please indicate your specialist interest/lead area in the box below

**38** You work

|                                    |                                    |
|------------------------------------|------------------------------------|
| <input type="checkbox"/> Full time | <input type="checkbox"/> Part time |
|------------------------------------|------------------------------------|

**39** Your number of years since qualifying has been

**40 The number of years in your current post has been**

**41 How much expertise do you feel that you have in the area of postnatal depression?**

I have no  
expertise

I have some  
expertise

I have a lot of  
expertise

**42 In an average week, approximately what percentage of the patients that you see would you say are females of child bearing age?**

**Thank you for taking the time to complete this survey.**

We would like to enter you into our prize draw for £100 worth of Amazon.co.uk vouchers as a thank you for taking the time to complete our survey. If you would not like to be included in the prize draw, please tick the box below.

Please do not enter me into the prize draw

If you would like to know more about The TRiP-LaB Project please visit our website at

[www.trip-lab.com](http://www.trip-lab.com)

**Blank Page**
